# Supplementary material for: MicroRNAs as biomarkers for major depression: a role for let-7b and let-7c
Source: PubMed Central journal article supplement (PMC5022079; doi:10.1038/tp.2016.131), 2016-08-02
Supplement: tp2016131x1.pdf [file tp2016131x1.pdf]

Table 1 - Microarray expression of let-7b and let-7c following ECT treatment

| Probe       | Responder |        | Non-responder |        |
|-------------|-----------|--------|---------------|--------|
|             | let-7b    | let-7c | let-7b        | let-7c |
| Average Hy3 | 11.435    | 10.104 | 11.435        | 10.104 |
| LogFC       | -0.625    | -0.597 | -0.843        | -0.783 |
| p-value     | 0.043     | 0.043  | 0.014         | 0.014  |

Average Hy3: array signal intensity, LogFC:log2(foldchange)

Table 2 - qRT-PCR MicroRNA expression at baseline and after treatment

|         | Relative fold change ± SEM (p-value) |                                |
|---------|--------------------------------------|--------------------------------|
|         | Pre                                  | Post                           |
| miR-16  | 0.741 ± 0.072 (0.128)                | 0.995 ± 0.122 (0.620)          |
| miR-182 | 0.955 ± 0.118 (0.509)                | 0.94 ± 0.099 (0.674)           |
| miR-451 | 1.065 ± 0.170 (0.584)                | 1.113 ± 0.158 (0.964)          |
| miR-223 | 1.093 ± 0.118 (0.838)                | 1.126 ± 0.112 (0.733)          |
| let-7b  | 0.627 ± 0.076 ( <b>0.027</b> )       | 0.605 ± 0.079 ( <b>0.011</b> ) |
| let-7c  | 0.743 ± 0.138 (0.173)                | 0.77 ± 0.205 (0.106)           |

Table 3 - qRT-PCR MicroRNA expression at baseline and after ECT or KET treatment

|         | Relative fold change ± SEM (p-value) |                                |                       |                                    |
|---------|--------------------------------------|--------------------------------|-----------------------|------------------------------------|
|         | Pre-ECT                              | Post-ECT                       | Pre-KET               | Post-KET                           |
| miR-16  | 0.728 ± 0.085 (0.145)                | 0.883 ± 0.119 (0.374)          | 0.761 ± 0.130 (0.249) | 1.192 ± 0.263 (0.786)              |
| miR-182 | 0.968 ± 0.182 (0.430)                | 0.915 ± 0.125 (0.548)          | 0.937 ± 0.126 (0.782) | 0.986 ± 0.167 (0.969)              |
| miR-451 | 1.189 ± 0.262 (0.764)                | 1.283 ± 0.230 (0.593)          | 0.875 ± 0.152 (0.400) | 0.801 ± 0.112 (0.373)              |
| miR-223 | 1.025 ± 0.121 (0.711)                | 1.216 ± 0.163 (0.481)          | 1.191 ± 0.231 (0.940) | 0.961 ± 0.099 (0.745)              |
| let-7b  | 0.644 ± 0.094 ( <b>0.044</b> )       | 0.478 ± 0.073 ( <b>0.003</b> ) | 0.602 ± 0.131 (0.065) | 0.832 ± 0.162 (0.329) <sup>#</sup> |
| let-7c  | 0.526 ± 0.087 (0.078)                | 0.495 ± 0.119 ( <b>0.028</b> ) | 1.054 ± 0.300 (0.511) | 1.235 ± 0.499 (0.614)              |

<sup>#</sup> Let-7b: Post-ECT vs Post-KET, p=0.061

Table 4 - qRT-PCR MicroRNA expression at baseline and after treatment

|         | Relative fold change ± SEM (p-value) |                       |                       |                                |
|---------|--------------------------------------|-----------------------|-----------------------|--------------------------------|
|         | Responder (Pre)                      | Responder (Post)      | Non-Responder (Pre)   | Non-Responder (Post)           |
| miR-16  | 0.757 ± 0.088 (0.187)                | 0.929 ± 0.141 (0.441) | 0.776 ± 0.143 (0.384) | 1.166 ± 0.249 (0.800)          |
| miR-182 | 0.988 ± 0.167 (0.540)                | 0.869 ± 0.112 (0.413) | 0.856 ± 0.155 (0.414) | 1.171 ± 0.195 (0.469)          |
| miR-451 | 1.134 ± 0.204 (0.956)                | 1.094 ± 0.187 (0.847) | 1.069 ± 0.384 (0.521) | 1.166 ± 0.312 (1.000)          |
| miR-223 | 1.142 ± 0.158 (0.643)                | 1.134 ± 0.137 (0.494) | 0.939 ± 0.100 (0.773) | 1.103 ± 0.195 (0.893)          |
| let-7b  | 0.659 ± 0.094 (0.082)                | 0.623 ± 0.082 (0.165) | 0.645 ± 0.150 (0.113) | 0.560 ± 0.196 ( <b>0.034</b> ) |
| let-7c  | 0.763 ± 0.169 (0.302)                | 0.747 ± 0.205 (0.169) | 0.746 ± 0.304 (0.201) | 0.827 ± 0.524 (0.113)          |

Table 5 - qRT-PCR MicroRNA expression at baseline and after ECT treatment

|         | Relative fold change ± SEM (p-value) |                       |                                |                                |
|---------|--------------------------------------|-----------------------|--------------------------------|--------------------------------|
|         | ECT Responder (Pre)                  | ECT Responder (Post)  | ECT Non-Responder (Pre)        | ECT Non-Responder (Post)       |
| miR-16  | 0.726 ± 0.094 (0.114)                | 0.817 ± 0.117 (0.277) | 0.785 ± 0.185 (0.177)          | 1.008 ± 0.270 (0.664)          |
| miR-182 | 1.038 ± 0.267 (0.524)                | 0.787 ± 0.143 (0.231) | 0.844 ± 0.913 (0.395)          | 1.189 ± 0.224 (0.506)          |
| miR-451 | 1.192 ± 0.325 (0.844)                | 1.241 ± 0.299 (0.794) | 1.233 ± 0.520 (0.725)          | 1.137 ± 0.365 (0.405)          |
| miR-223 | 1.071 ± 0.187 (0.795)                | 1.221 ± 0.215 (0.539) | 0.951 ± 0.131 (0.791)          | 1.202 ± 0.240 (0.815)          |
| let-7b  | 0.636 ± 0.132 (0.097)                | 0.562 ± 0.098 (0.123) | 0.636 ± 0.147 (0.177)          | 0.319 ± 0.081 ( <b>0.003</b> ) |
| let-7c  | 0.612 ± 0.116 (0.310)                | 0.662 ± 0.172 (0.220) | 0.298 ± 0.089 ( <b>0.016</b> ) | 0.203 ± 0.040 ( <b>0.003</b> ) |

Table 6 - qRT-PCR MicroRNA expression at baseline and after KET treatment

|         | Relative fold change ± SEM (p-value) |                       |                         |                          |
|---------|--------------------------------------|-----------------------|-------------------------|--------------------------|
|         | KET Responder (Pre)                  | KET Responder (Post)  | KET Non-Responder (Pre) | KET Non-Responder (Post) |
| miR-16  | 0.804 ± 0.173 (0.181)                | 1.082 ± 0.293 (0.552) | 0.753 ± 0.231 (0.429)   | 1.800 ± 0.470 (0.103)    |
| miR-182 | 0.922 ± 0.169 (0.692)                | 0.981 ± 0.183 (0.967) | 0.884 ± 0.317 (0.732)   | 1.043                    |
| miR-451 | 1.052 ± 0.200 (0.945)                | 0.872 ± 0.120 (0.694) | 0.629 ± 0.202 (0.282)   | 0.446 ± 0.177 (0.118)    |
| miR-223 | 1.231 ± 0.278 (0.606)                | 1.002 ± 0.115 (0.646) | 0.908 ± 0.150 (0.900)   | 0.755 ± 0.013 (0.864)    |
| let-7b  | 0.687 ± 0.138 (0.213)                | 0.707 ± 0.140 (0.235) | 0.684 ± 0.636 (0.134)   | 1.159 ± 0.630 (0.365)    |
| let-7c  | 0.957 ± 0.357 (0.459)                | 0.854 ± 0.421 (0.258) | 1.939 ± 0.798 (0.184)   | 3.325 ± 2.118 (0.094)    |

Table 7 - qRT-PCR MicroRNA expression at baseline

|         | Relative fold change ± SEM (p-value) |                              |
|---------|--------------------------------------|------------------------------|
|         | KET Long-term Responder              | KET Long-term Non-Responders |
| miR-16  | 0.888 ± 0.348 (0.399)                | 0.748 ± 0.200 (0.176)        |
| miR-182 | 1.053 ± 0.282 (0.833)                | 0.813 ± 0.215 (0.445)        |
| miR-451 | 1.233 ± 0.379 (0.508)                | 0.931 ± 0.234 (0.768)        |
| miR-223 | 1.572 ± 0.513 (0.246)                | 0.947 ± 0.271 (0.796)        |
| let-7b  | 0.676 ± 0.235 (0.298)                | 0.697 ± 0.182 (0.350)        |
| let-7c  | 1.387 ± 0.731 (0.899)                | 0.598 ± 0.233 (0.296)        |
